# Supplementary material for: Polyfluoroalkyl compounds in the East Greenland Arctic Ocean
Source: Royal Society of Chemistry journal article supplement (doi:10.1039/c002242j), 2010-01-01

## Supplementary Material (ESI) for Journal of Environmental Monitoring

This journal is © The Royal Society of Chemistry 2010

S1: Analytes, acronyms, formula, supplier, purity, precursor and product ion, and corresponding internal standard

| Substance                                        | Acronym                 | Formula                                                                                           | Supplier and purity (%) | Precursor/Product ion | Corresponding IS                        |
|--------------------------------------------------|-------------------------|---------------------------------------------------------------------------------------------------|-------------------------|-----------------------|-----------------------------------------|
| Perfluorobutane sulfonate                        | PFBS                    | C <sub>4</sub> F <sub>9</sub> SO <sub>2</sub> O <sup>-</sup>                                      | Fluka (97)              | 298.877/79.8          | [ <sup>18</sup> O <sub>2</sub> ]-PFHxS  |
| Perfluoropentane sulfonate                       | PFPS                    | C <sub>5</sub> F <sub>11</sub> SO <sub>2</sub> O <sup>-</sup>                                     | n.a.                    | 348.939/79.8          | [ <sup>18</sup> O <sub>2</sub> ]-PFHxS  |
| Perfluorohexane sulfonate                        | PFHxS                   | C <sub>6</sub> F <sub>13</sub> SO <sub>2</sub> O <sup>-</sup>                                     | Fluka (98)              | 398.939/79.8          | [ <sup>18</sup> O <sub>2</sub> ]-PFHxS  |
| Perfluorheptane sulfonate                        | PFHpS                   | C <sub>7</sub> F <sub>15</sub> SO <sub>2</sub> O <sup>-</sup>                                     | Well. Lab. (>98)        | 449.034/79.3          | [ <sup>13</sup> C <sub>4</sub> ]-PFOS   |
| Perfluorocotane sulfonate                        | PFOS                    | C <sub>8</sub> F <sub>17</sub> SO <sub>2</sub> O <sup>-</sup>                                     | Well. Lab. (>98)        | 498.971/97.7          | [ <sup>13</sup> C <sub>4</sub> ]-PFOS   |
| Perfluorononane sulfonate                        | PFNS                    | C <sub>9</sub> F <sub>19</sub> SO <sub>2</sub> O <sup>-</sup>                                     | n.a.                    | 548.926/79.8          | [ <sup>13</sup> C <sub>4</sub> ]-PFOS   |
| Perfluorodecane sulfonate                        | PFDS                    | C <sub>10</sub> F <sub>21</sub> SO <sub>2</sub> O <sup>-</sup>                                    | Well. Lab. (>98)        | 598.896/79.5          | [ <sup>13</sup> C <sub>4</sub> ]-PFOS   |
| 6:2 fluorotemomer sulfonate                      | 6:2 FTS                 | C <sub>6</sub> F <sub>13</sub> C <sub>2</sub> H <sub>4</sub> SO <sub>3</sub>                      | ABCR (98)               | 426.925/406.7         | [ <sup>13</sup> C <sub>4</sub> ]-PFOS   |
| Perfluorobutanoic acid                           | PFBA                    | C <sub>3</sub> F <sub>7</sub> COOH                                                                | ABCR (98)               | 112.900/168.7         | [ <sup>13</sup> C <sub>4</sub> ]-PFOSI  |
| Perfluoropentanoic acid                          | PFPeA                   | C <sub>4</sub> F <sub>9</sub> COOH                                                                | Alfa Aesar (98)         | 262.825/218.9         | [ <sup>13</sup> C <sub>4</sub> ]-PFBA   |
| Perfluorohexanoic acid                           | PFHxA                   | C <sub>5</sub> F <sub>11</sub> COOH                                                               | Fluka (97)              | 312.934/268.8         | [ <sup>13</sup> C <sub>2</sub> ]-PFHxA  |
| Perfluoroheptanoic acid                          | PFHpA                   | C <sub>6</sub> F <sub>13</sub> COOH                                                               | Lanc. Syn. (98)         | 362.950/318.9         | [ <sup>13</sup> C <sub>2</sub> ]-PFHxA  |
| Perfluorooctanoic acid                           | PFOA                    | C <sub>7</sub> F <sub>14</sub> COOH                                                               | Lanc. Syn. (95)         | 412.987/368.9         | [ <sup>13</sup> C <sub>4</sub> ]-PFOA   |
| Perfluorononanoic acid                           | PFNA                    | C <sub>8</sub> F <sub>15</sub> COOH                                                               | Lanc. Syn. (97)         | 462.908/418.9         | [ <sup>13</sup> C <sub>4</sub> ]-PFOA   |
| Perfluorodecanoic acid                           | PFDA                    | C <sub>9</sub> F <sub>17</sub> COOH                                                               | Lanc. Syn. (97)         | 512.876/469.0         | [ <sup>13</sup> C <sub>5</sub> ]-PFNA   |
| Perfluoroundecanoic acid                         | PFUnDA                  | C <sub>10</sub> F <sub>19</sub> COOH                                                              | ABCR (96)               | 562.865/519.0         | [ <sup>13</sup> C <sub>2</sub> ]-PFDA   |
| Perfluorododecanoic acid                         | PFDoDA                  | C <sub>11</sub> F <sub>21</sub> COOH                                                              | Alfa Aesar (96)         | 612.991/568.9         | [ <sup>13</sup> C <sub>2</sub> ]-PFUnDA |
| Perfluorotridecanoic acid                        | PFTriDA                 | C <sub>12</sub> F <sub>23</sub> COOH                                                              | Well. Lab. (>98)        | 663.094/618.9         | [ <sup>13</sup> C <sub>2</sub> ]-PFDoDA |
| Perfluorotetradecanoic acid                      | PFTeDA                  | C <sub>13</sub> F <sub>25</sub> COOH                                                              | Alfa Aesar (96)         | 713.036/669.0         | [ <sup>13</sup> C <sub>2</sub> ]-PFDoDA |
| Perfluorotridecanoic acid                        | PFPDA                   | C <sub>14</sub> F <sub>27</sub> COOH                                                              | n.a.                    | 762.980/718.9         | [ <sup>13</sup> C <sub>2</sub> ]-PFDoDA |
| Perfluorohexadecanoic acid                       | PFHxDA                  | C <sub>15</sub> F <sub>29</sub> COOH                                                              | Alfa Aesar (96)         | 812.840/769.1         | [ <sup>13</sup> C <sub>2</sub> ]-PFDoDA |
| Perfluoroheptadecanoic acid                      | PFHpDA                  | C <sub>16</sub> F <sub>31</sub> COOH                                                              | n.a.                    | 862.980/818.9         | [ <sup>13</sup> C <sub>2</sub> ]-PFDoDA |
| Perfluorooctadecanoic acid                       | PFOcDA                  | C <sub>17</sub> F <sub>33</sub> COOH                                                              | Alfa Aesar (96)         | 912.870/869.0         | [ <sup>13</sup> C <sub>2</sub> ]-PFDoDA |
| Perfluoro-3,7-bis(trifluoromethyl)-octanoic acid | 3,7m <sub>2</sub> -PFOA | C <sub>6</sub> F <sub>19</sub> COOH                                                               | Alfa Aesar (97)         | 512.885/468.9         | [ <sup>13</sup> C <sub>4</sub> ]-PFOA   |
| Perfluorohexylphosphonic acid                    | PFHxA                   | C <sub>6</sub> F <sub>13</sub> PO(OH) <sub>2</sub>                                                | Well. Lab. (>98)        | 399.000/78.8          | [ <sup>13</sup> C <sub>4</sub> ]-PFOS   |
| Perfluorooctylphosphonic acid                    | PFOPA                   | C <sub>8</sub> F <sub>17</sub> PO(OH) <sub>2</sub>                                                | Well. Lab. (>98)        | 499.000/78.8          | [ <sup>13</sup> C <sub>4</sub> ]-PFOS   |
| Perfluorodecylphosphonic acid                    | PFDPDA                  | C <sub>10</sub> F <sub>21</sub> PO(OH) <sub>2</sub>                                               | Well. Lab. (>98)        | 599.100/78.8          | [ <sup>13</sup> C <sub>4</sub> ]-PFOS   |
| Perfluorooctane sulfonamid                       | PFOSA                   | C <sub>8</sub> F <sub>17</sub> SO <sub>2</sub> NH <sub>2</sub>                                    | ABCR (97)               | 497.896/77.9          | [ <sup>13</sup> C <sub>4</sub> ]-PFOS   |
| N-methylperfluorobutane sulfonamidoethanol       | MEFBSE                  | C <sub>4</sub> F <sub>9</sub> SO <sub>2</sub> N(CH <sub>3</sub> )C <sub>2</sub> H <sub>4</sub> OH | 3M (n.a.)               | 416.047/59.0          | [ <sup>13</sup> C <sub>4</sub> ]-PFOS   |
| 2-perfluorohexylethanoic acid                    | FHEA                    | C <sub>6</sub> F <sub>13</sub> CH <sub>2</sub> COOF                                               | Well. Lab. (>98)        | 376.945/292.8         | [ <sup>13</sup> C]-CFHEA                |
| 2-perfluorooctylethanoic acid                    | FOEA                    | C <sub>8</sub> F <sub>17</sub> CH <sub>2</sub> COOH                                               | Well. Lab. (>98)        | 476.909/392.9         | [ <sup>13</sup> C]-FOEA                 |
| 2-perfluorodecylethanoic acid                    | FDEA                    | C <sub>10</sub> F <sub>21</sub> CH <sub>2</sub> COOH                                              | Well. Lab. (>98)        | 577.011/493.0         | [ <sup>13</sup> C]-FDEA                 |
| 2H-perfluoro-2-octenoic acid                     | FHUEA                   | C <sub>6</sub> F <sub>12</sub> CHCOOH                                                             | Well. Lab. (>98)        | 356.885/293.0         | [ <sup>13</sup> C]-FHUEA                |
| 2H-perfluoro-2-decenoic acid                     | FOUEA                   | C <sub>8</sub> F <sub>16</sub> CHCOOH                                                             | Well. Lab. (>98)        | 456.803/292.8         | [ <sup>13</sup> C]-FOUEA                |
| 2H-perfluoro-2-dodecenoic acid                   | FDUEA                   | C <sub>10</sub> F <sub>20</sub> CHCOOH                                                            | Well. Lab. (>98)        | 556.973/493.1         | [ <sup>13</sup> C]-FDUEA                |

## Supplementary Material (ESI) for Journal of Environmental Monitoring

This journal is © The Royal Society of Chemistry 2010

## S2: Internal standards and injection standard, acronyms, formula, supplier, purity, precursor and product ion

| Internal Standard                                                   | Acronym                                              | Formula                                                                                                                                                       | Supplier and purity (%) | Precursor/Product ion      |
|---------------------------------------------------------------------|------------------------------------------------------|---------------------------------------------------------------------------------------------------------------------------------------------------------------|-------------------------|----------------------------|
| Perfluoro-1-hexane- <sup>18</sup> O <sub>2</sub> ]sulfonate         | [ <sup>18</sup> O <sub>2</sub> ]-PFHxS               | C <sub>6</sub> F <sub>13</sub> S[ <sup>18</sup> O <sub>2</sub> ]O <sup>-</sup>                                                                                | Well. Lab. (>98)        | 402.981/83.9               |
| Perfluoro-1-[1,2,3,4- <sup>13</sup> C <sub>4</sub> ]octanesulfonate | [ <sup>13</sup> C <sub>4</sub> ]-PFOS                | C <sub>4</sub> F <sub>9</sub> [1,2,3,4- <sup>13</sup> C <sub>4</sub> ]-F <sub>8</sub> SO <sub>2</sub> O <sup>-</sup>                                          | Well. Lab. (>98)        | 502.899/79.5               |
| Perfluoro-n-[1,2,3,4- <sup>13</sup> C <sub>4</sub> ]butanoic acid   | [ <sup>13</sup> C <sub>4</sub> ]-PFBA                | 2,3,4- <sup>13</sup> C <sub>3</sub> F <sub>7</sub> <sup>13</sup> COOH                                                                                         | Well. Lab. (>98)        | 216.823/171.8              |
| Perfluoro-n-[1,2- <sup>13</sup> C <sub>2</sub> ]hexanoic acid       | [ <sup>13</sup> C <sub>2</sub> ]-PFHxA               | C <sub>4</sub> F <sub>9</sub> [2- <sup>13</sup> C]F <sub>2</sub> <sup>13</sup> COOH                                                                           | Well. Lab. (>98)        | 314.891/269.9              |
| Perfluoro-n-[1,2,3,4- <sup>13</sup> C <sub>4</sub> ]octanoic acid   | [ <sup>13</sup> C <sub>4</sub> ]-PFOA                | C <sub>4</sub> F <sub>9</sub> [2,3,4- <sup>13</sup> C <sub>3</sub> ]F <sub>6</sub> <sup>13</sup> COOH                                                         | Well. Lab. (>98)        | 416.978/371.8              |
| Perfluoro-n-[1,2,3,4,5- <sup>13</sup> C <sub>5</sub> ]nonanoic acid | [ <sup>13</sup> C <sub>5</sub> ]-PFNA                | C <sub>4</sub> F <sub>9</sub> [2,3,4,5- <sup>13</sup> C <sub>5</sub> ]F <sub>8</sub> <sup>13</sup> COOH                                                       | Well. Lab. (>98)        | 467.907/423.0              |
| Perfluoro-n-[1,2- <sup>13</sup> C <sub>2</sub> ]decanoic acid       | [ <sup>13</sup> C <sub>2</sub> ]-PFDA                | C <sub>8</sub> F <sub>17</sub> <sup>13</sup> CF <sub>2</sub> <sup>13</sup> COOH                                                                               | Well. Lab. (>98)        | 514.944/469.8              |
| Perfluoro-n-[1,2- <sup>13</sup> C <sub>2</sub> ]undecanoic acid     | [ <sup>13</sup> C <sub>2</sub> ]-PFUnDA              | C <sub>9</sub> F <sub>19</sub> <sup>13</sup> CF <sub>2</sub> <sup>13</sup> COOH                                                                               | Well. Lab. (>98)        | 564.959/519.8              |
| Perfluoro-n-[1,2- <sup>13</sup> C]dodecanoin acid                   | [ <sup>13</sup> C <sub>2</sub> ]-PFD <sub>o</sub> DA | C <sub>10</sub> F <sub>21</sub> CF <sub>2</sub> <sup>13</sup> COOH                                                                                            | Well. Lab. (>98)        | 614.9 <sup>13</sup> /569.9 |
| 2-perfluorohexyl-[1,2- <sup>13</sup> C <sub>2</sub> ]ethanoic acid  | [ <sup>13</sup> C <sub>2</sub> ]-FHEA                | C <sub>6</sub> F <sub>13</sub> CH <sub>2</sub> <sup>13</sup> COOH                                                                                             | Well. Lab. (>98)        | 378.912/294.0              |
| 2-perfluorooctyl-[1,2- <sup>13</sup> C <sub>2</sub> ]ethanoic acid  | [ <sup>13</sup> C <sub>2</sub> ]-FOEA                | C <sub>8</sub> F <sub>17</sub> <sup>13</sup> CH <sub>2</sub> <sup>13</sup> COOH                                                                               | Well. Lab. (>98)        | 478.911/393.8              |
| 2-perfluorodecyl-[1,2- <sup>13</sup> C <sub>2</sub> ]-FDEA          | [ <sup>13</sup> C <sub>2</sub> ]-FDEA                | C <sub>10</sub> F <sub>21</sub> <sup>13</sup> CH <sub>2</sub> <sup>13</sup> COOH                                                                              | Well. Lab. (>98)        | 579.017/494.1              |
| 2H-perfluoro-[1,2- <sup>13</sup> C <sub>2</sub> ]-2-octenoic acid   | [ <sup>13</sup> C <sub>2</sub> ]-FHUEA               | C <sub>6</sub> F <sub>12</sub> <sup>13</sup> CH <sup>13</sup> COOH                                                                                            | Well. Lab. (>98)        | 358.907/294.0              |
| 2H-perfluoro-[1,2- <sup>13</sup> C <sub>2</sub> ]-2-decenoic acid   | [ <sup>13</sup> C <sub>2</sub> ]-FOUEA               | C <sub>8</sub> F <sub>16</sub> <sup>13</sup> CH <sup>13</sup> COOH                                                                                            | Well. Lab. (>98)        | 458.903/393.8              |
| 2H-perfluoro-[1,2- <sup>13</sup> C <sub>2</sub> ]-2-dodecenoic acid | [ <sup>13</sup> C <sub>2</sub> ]-FDUEA               | C <sub>10</sub> F <sub>20</sub> <sup>13</sup> CH <sup>13</sup> COOH                                                                                           | Well. Lab. (>98)        | 558.955/494.0              |
| N-deuterioethylperfluoro-1-octanesulfonamidoacetic acid             | D5-EtFOSA<br>A                                       | C <sub>8</sub> F <sub>17</sub> SO <sub>2</sub> N(C <sub>2</sub> D <sub>2</sub> C <sub>2</sub> D <sub>3</sub> )C <sub>2</sub> H <sub>2</sub> CO <sub>2</sub> H | Well. Lab. (>98)        | 589.015/418.7              |

S3: Recovery rates of each internal standard (IS) in the water samples.

| Substance                           | Recovery rate |
|-------------------------------------|---------------|
| <sup>18</sup> O <sub>2</sub> -PFHXS | 23.4 ± 10.6   |
| <sup>13</sup> C-PFOS                | 22.0 ± 13.0   |
| <sup>13</sup> C-PFBA                | 9.88 ± 18.5   |
| <sup>13</sup> C-PFHxA               | 21.4 ± 34.9   |
| <sup>13</sup> C-PFOA                | 27.9 ± 10.8   |
| <sup>13</sup> C-PFNA                | 35.1 ± 12.9   |
| <sup>13</sup> C-PFDA                | 23.6 ± 12.8   |
| <sup>13</sup> C-PFU <sub>n</sub> DA | 15.9 ± 11.6   |
| <sup>13</sup> C-PFDoDA              | 13.8 ± 10.6   |
| <sup>13</sup> C-FHEA                | 23.0 ± 10.9   |
| <sup>13</sup> C-FHOEA               | 36.1 ± 13.9   |
| <sup>13</sup> C-FDEA                | 16.9 ± 12.3   |
| <sup>13</sup> C-FHUEA               | 23.1 ± 10.3   |
| <sup>13</sup> C-FOUEA               | 35.6 ± 17.1   |
| <sup>13</sup> C-FDUEA               | 16.3 ± 12.1   |
| mean                                | 22.9 ± 14.1   |

Supplementary Material (ESI) for Journal of Environmental Monitoring

This journal is © The Royal Society of Chemistry 2010

S4: Mass detection limits (MDL) and mass quantification limits (MQL) calculated as signal-to-noise ratio of three and ten, respectively, in  $\text{pg L}^{-1}$  for all compounds found in the water samples. PFNS is not in the list, since it was not quantified.

| substance | MDL  | MQL  |
|-----------|------|------|
| PFHxS     | 9.86 | 32.9 |
| PFOS      | 22.7 | 75.5 |
| PFHxA     | 13.2 | 43.9 |
| PFHpA     | 5.78 | 19.3 |
| PFOA      | 11.8 | 39.4 |
| PFNA      | 3.06 | 10.2 |
| PFOSA     | 36.5 | 122  |

## Supplementary Material (ESI) for Journal of Environmental Monitoring

This journal is © The Royal Society of Chemistry 2010

S5: Concentrations of each compound found in 2 L water samples. All concentrations are in  $\text{pg L}^{-1}$ . Concentrations between MDL and MQL are shown as calculated concentrations. In the manuscript concentrations between MDL and MQL were defined as 50% MDL. (n.d. = not detected)

|    | PFOA   | PFHpA | PFHxA | PFNS   | PFOS  | PFHxS | PFOSA  | latitude | salinity (psu) |
|----|--------|-------|-------|--------|-------|-------|--------|----------|----------------|
| 1  | 17.43  | n.d.  | n.d.  | 160.18 | 42.64 | 10.73 | n.d.   | 67.51    | 34.72          |
| 2  | 45.87  | n.d.  | n.d.  | 74.21  | 45.31 | n.d.  | 36.35  | 68.95    | 34.62          |
| 3  | 24.83  | n.d.  | n.d.  | 91.85  | n.d.  | n.d.  | n.d.   | 69.46    | 34.72          |
| 4  | 38.90  | n.d.  | n.d.  | 51.54  | 49.67 | n.d.  | n.d.   | 70.39    | 34.65          |
| 5  | 61.41  | n.d.  | n.d.  | 71.68  | 25.36 | n.d.  | n.d.   | 70.45    | 36.66          |
| 6  | 94.90  | 17.01 | 16.66 | 28.65  | 38.62 | 22.81 | n.d.   | 70.73    | 32.64          |
| 7  | 29.39  | 6.78  | n.d.  | n.d.   | 54.48 | n.d.  | n.d.   | 70.86    | 33.19          |
| 8  | 65.19  | 24.60 | n.d.  | 34.61  | n.d.  | 16.90 | n.d.   | 71.57    | 26.21          |
| 9  | 49.59  | n.d.  | n.d.  | n.d.   | n.d.  | n.d.  | n.d.   | 72.03    | 34.61          |
| 10 | 53.98  | 9.22  | n.d.  | 22.17  | 50.39 | 21.66 | 49.23  | 72.07    | 25.28          |
| 11 | 44.69  | n.d.  | n.d.  | 23.01  | 54.91 | 18.90 | 72.55  | 72.23    | 19.02          |
| 12 | 72.36  | 23.00 | 15.41 | n.d.   | n.d.  | n.d.  | 62.24  | 73.02    | 21.45          |
| 13 | 85.15  | 19.67 | n.d.  | n.d.   | n.d.  | 17.53 | n.d.   | 73.15    | 29.34          |
| 14 | 69.47  | n.d.  | n.d.  | n.d.   | n.d.  | n.d.  | n.d.   | 73.45    | 33.38          |
| 15 | 6.70   | n.d.  | n.d.  | n.d.   | n.d.  | n.d.  | 162.86 | 73.80    | 34.36          |
| 16 | 32.93  | 12.30 | n.d.  | n.d.   | n.d.  | n.d.  | 51.43  | 73.98    | 33.83          |
| 17 | 82.15  | 26.89 | n.d.  | n.d.   | 39.18 | 14.72 | 76.12  | 74.24    | 29.95          |
| 18 | 38.06  | 7.84  | n.d.  | n.d.   | n.d.  | n.d.  | n.d.   | 74.42    | 33.18          |
| 19 | 46.29  | 6.56  | n.d.  | n.d.   | n.d.  | n.d.  | 37.37  | 74.63    | 34.41          |
| 20 | 12.53  | n.d.  | n.d.  | n.d.   | n.d.  | n.d.  | 123.64 | 75.37    | 34.89          |
| 21 | 68.09  | 26.77 | 14.73 | n.d.   | n.d.  | 10.41 | n.d.   | 76.15    | 25.70          |
| 22 | 19.66  | n.d.  | n.d.  | n.d.   | n.d.  | n.d.  | 75.28  | 76.18    | 35.12          |
| 23 | 62.31  | 7.67  | n.d.  | n.d.   | n.d.  | n.d.  | 150.09 | 76.37    | 35.01          |
| 24 | 37.40  | 7.39  | n.d.  | n.d.   | n.d.  | n.d.  | 184.18 | 76.41    | 35.08          |
| 25 | 77.49  | 15.42 | 16.90 | n.d.   | n.d.  | 14.39 | n.d.   | 76.47    | 26.65          |
| 26 | 54.67  | n.d.  | n.d.  | n.d.   | n.d.  | n.d.  | 98.86  | 76.85    | 34.71          |
| 27 | 22.71  | n.d.  | n.d.  | n.d.   | n.d.  | n.d.  | 130.62 | 77.12    | 34.18          |
| 28 | 26.65  | n.d.  | n.d.  | n.d.   | 31.29 | n.d.  | 111.89 | 77.22    | 35.00          |
| 29 | 46.06  | n.d.  | n.d.  | n.d.   | n.d.  | n.d.  | n.d.   | 77.41    | 34.78          |
| 30 | 119.71 | 23.11 | 33.26 | n.d.   | n.d.  | 24.12 | n.d.   | 78.21    | 34.98          |
| 31 | 91.47  | 20.40 | 18.70 | n.d.   | n.d.  | 18.53 | 300.03 | 78.31    | 27.62          |
| 32 | 69.97  | 17.01 | n.d.  | n.d.   | n.d.  | 26.94 | 99.05  | 79.05    | 28.89          |
| 33 | 34.85  | n.d.  | n.d.  | n.d.   | n.d.  | n.d.  | n.d.   | 79.11    | 34.72          |
| 34 | 40.44  | 6.14  | n.d.  | n.d.   | n.d.  | n.d.  | 217.91 | 79.94    | 32.26          |
| 35 | 48.26  | 20.82 | n.d.  | n.d.   | n.d.  | n.d.  | 41.86  | 80.16    | 28.63          |
| 36 | 117.07 | 26.76 | 37.72 | n.d.   | n.d.  | n.d.  | 192.09 | 80.23    | 29.95          |
| 37 | 64.40  | 19.56 | 14.41 | n.d.   | n.d.  | n.d.  | 72.31  | 80.31    | 24.57          |
| 38 | 57.17  | 19.81 | 17.17 | n.d.   | n.d.  | 11.94 | 80.31  | 80.43    | 26.51          |

S6: Concentrations of compounds (PFHxA, PFHpA, PFOA, PFOS, PFOSA) in  $\mu\text{g L}^{-1}$ .

Graphics were made with Ocean Data View 4 (<http://odv.awi.de/en>)

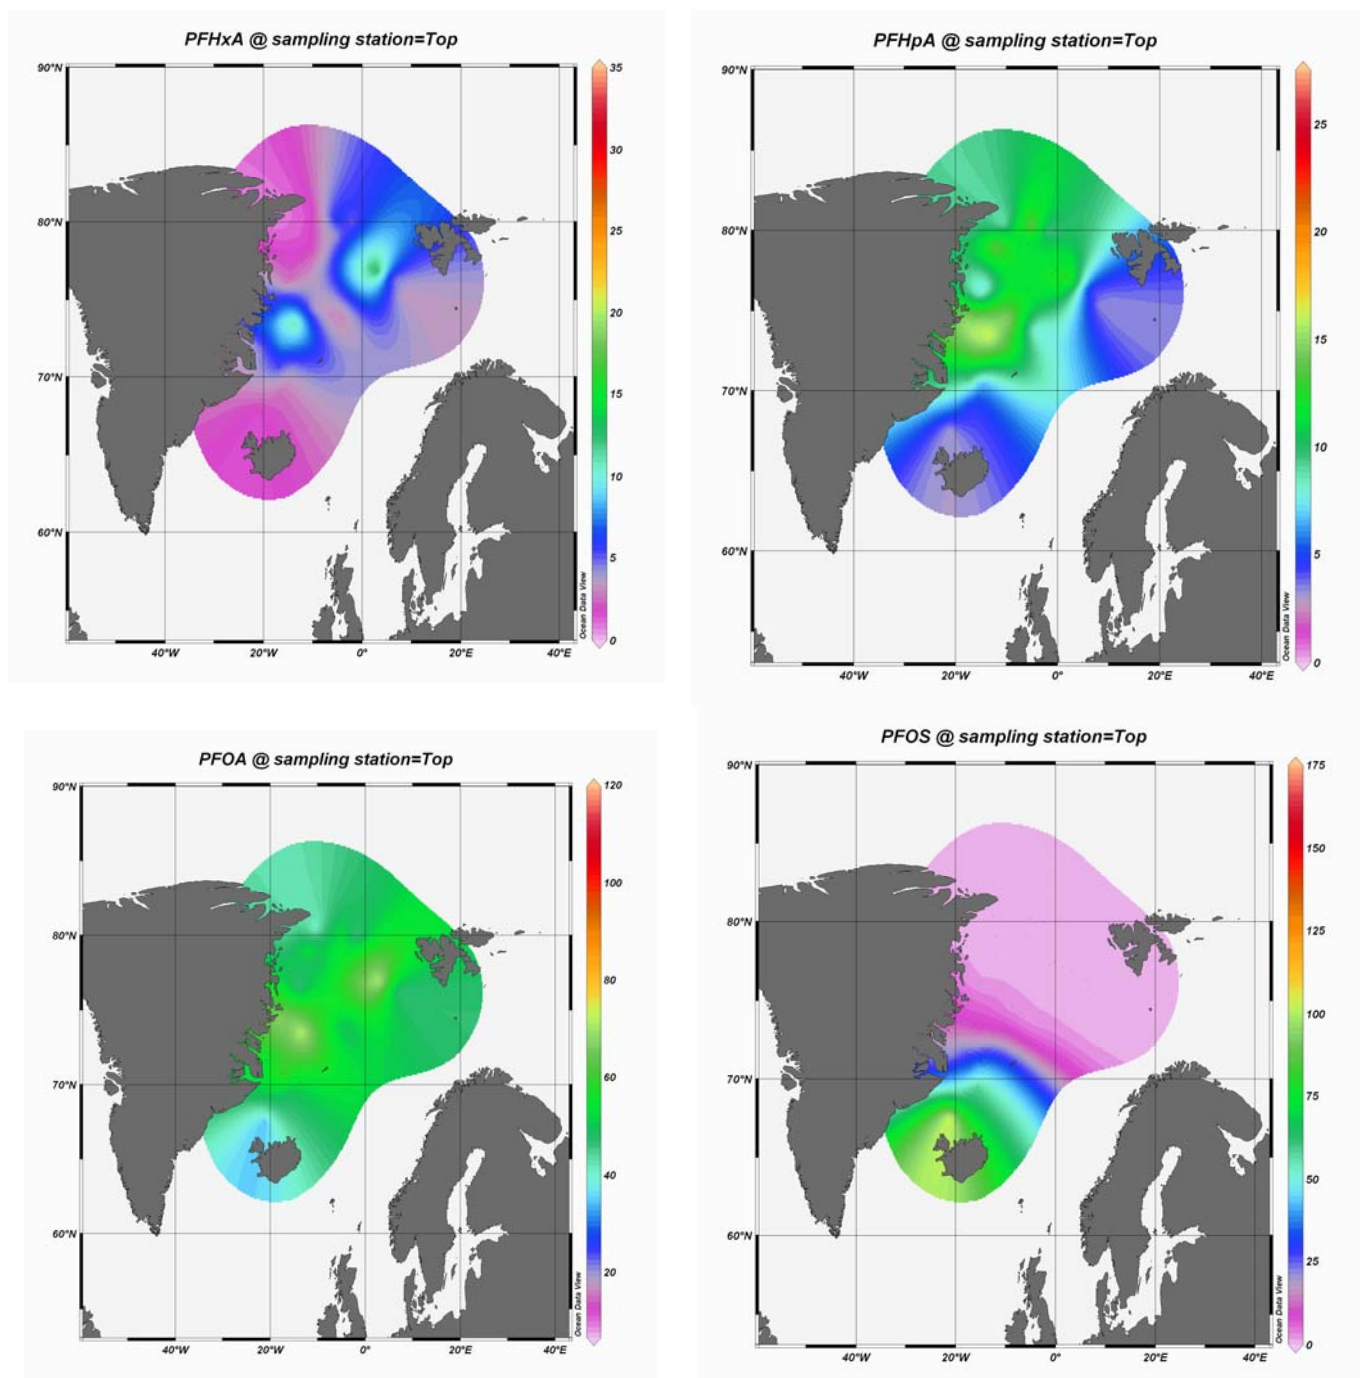

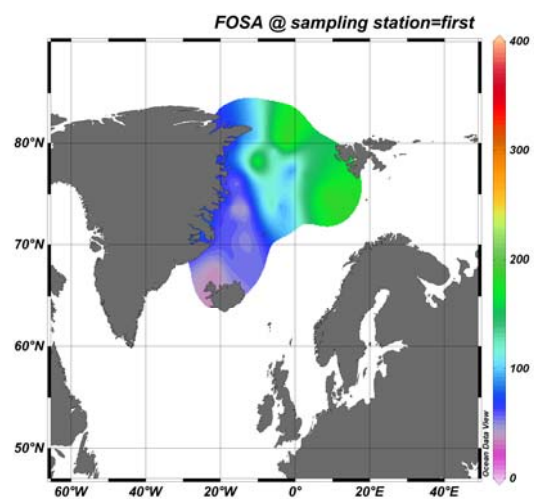

Supplement: c002242j.pdf [file c002242j.pdf]
